# Supplementary material for: Alternately layered Au/Fe3O4 with porous structure—a self-assembled nanoarchitecture for catalysis materials
Source: Royal Society of Chemistry journal article supplement (doi:10.1039/c0jm01708f), 2010-01-01
Supplement: c0jm01708f.pdf [file c0jm01708f.pdf]

***Figure on electronic supplementary information (ESI)***

**Alternately layered Au/Fe<sub>3</sub>O<sub>4</sub> with porous structure  
– a self-assembled nanoarchitecture for catalysis  
materials**

**Satoshi Kameoka <sup>1\*</sup> and An-Pang Tsai <sup>1, 2</sup>**

**<sup>1</sup> Institute of Multidisciplinary Research for Advanced Materials (IMRAM),  
Tohoku University, 2-1-1 katahira, Aoba-ku, Sendai 980-8577, Japan**

**<sup>2</sup> National Institute of Materials Science (NIMS), 1-2-1 Sengen, Tsukuba 305-  
0047, Japan**

**\* Corresponding author; e-mail: [kameoka@tagen.tohoku.ac.jp](mailto:kameoka@tagen.tohoku.ac.jp)**

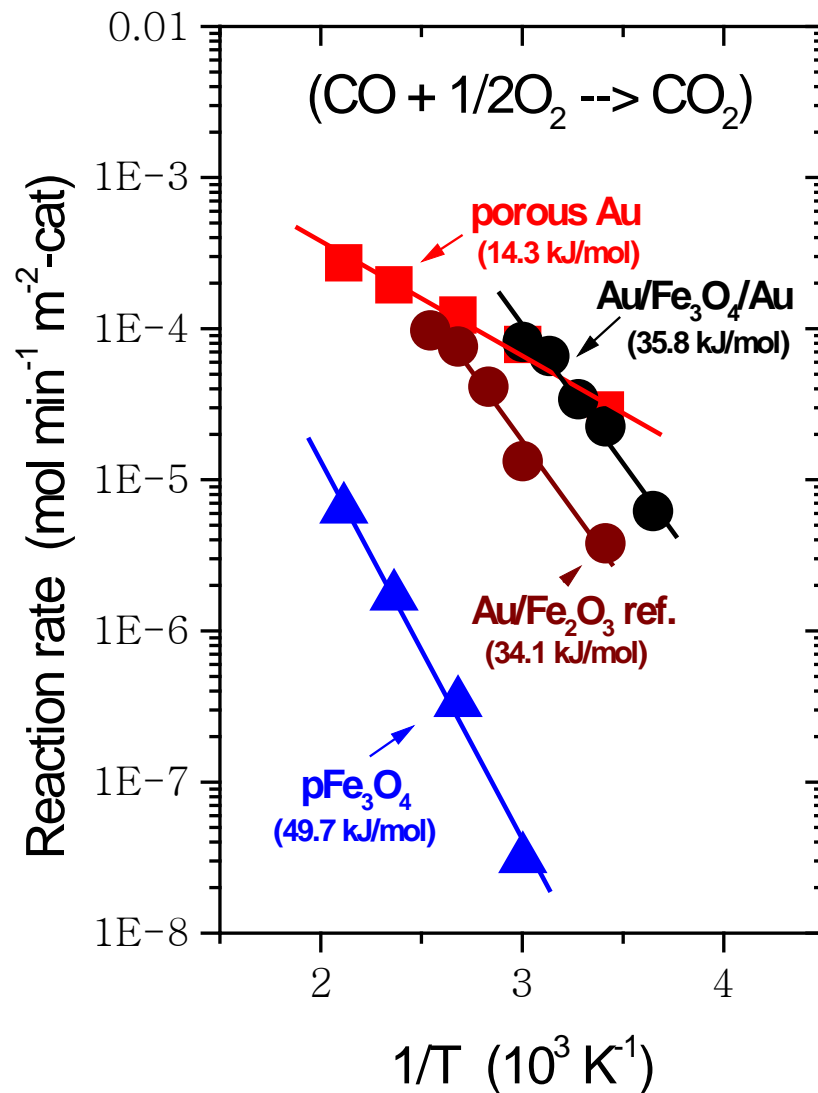

Figure S1

Arrhenius plots for the reaction rate of CO oxidation over porous Au (Al-Au), nanoporous Au/Fe<sub>3</sub>O<sub>4</sub>/Au (Al-Au-Fe), Fe<sub>3</sub>O<sub>4</sub> particles (Al-Fe) and reference Au/Fe<sub>2</sub>O<sub>3</sub> catalysts using the data in Fig. 3(A).

(a)

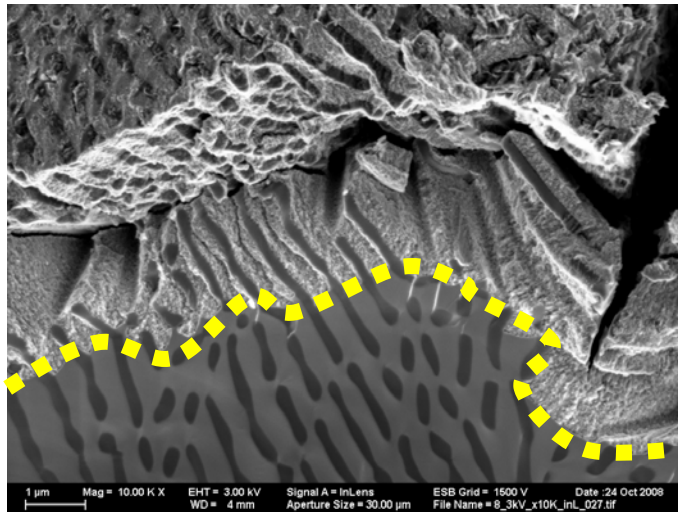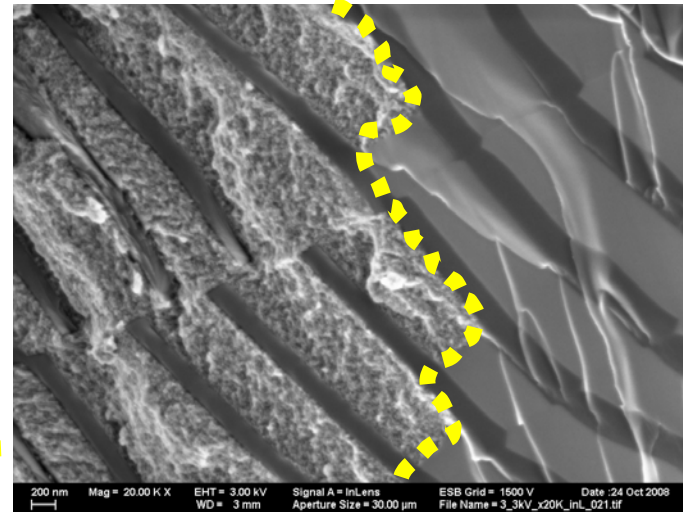

(b)

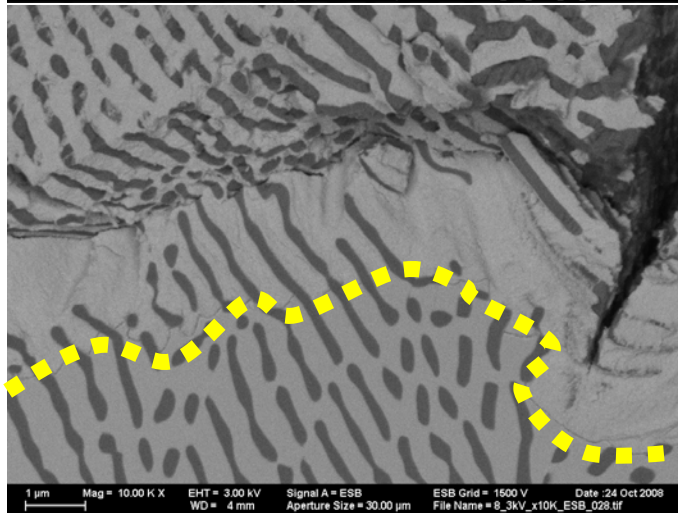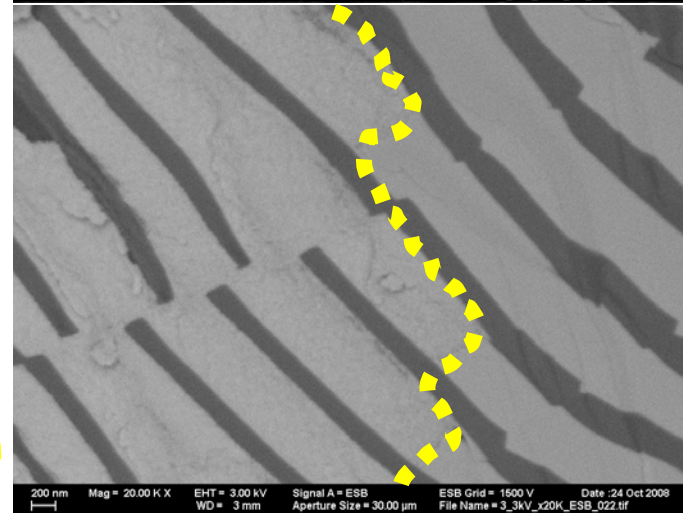

*Low magnification*

*High magnification*

Figure S2

High-resolution secondary electron images (a) and back scattering images (b) of the leached Al-Au-Fe alloy showing the interface between the non-leached and the leached regions at low magnification and high magnification. Note that dotted line indicates the boundary of leaching-non leaching region. The  $\text{Al}_2\text{Fe}$  regions have the pinning effect upon leaching. The dotted line indicates the boundary of leaching-non leaching region of the Al-Au-Fe alloy.
